# Supplementary material for: Bifunctional PDDA-stabilized β-Fe2O3 nanoclusters for improved photoelectrocatalytic and magnetic field enhanced photocatalytic applications
Source: Royal Society of Chemistry journal article supplement (doi:10.1039/d2cy00099g), 2022-01-01
Supplement: d2cy00099g1.pdf [file d2cy00099g1.pdf]

# Bifunctional PDDA-stabilized $\beta$ -Fe<sub>2</sub>O<sub>3</sub> nanocluster for improved photoelectrocatalytic and magnetic field enhancing photocatalytic applications

Maoqi Li <sup>a,b</sup>, Jian Wu <sup>b\*</sup> and Guoliang Shen <sup>a\*</sup>

*a. School of Petrochemical Engineering, Shenyang University of Technology, Liaoyang 111003, P. R. China*

*b. Key Laboratory of Magnetic Materials and Devices, Ningbo Institute of Materials Technology and Engineering, Chinese Academy of Sciences, Ningbo, 315201, P. R. China*

\*Corresponding author's email: [jwu@nimte.ac.cn](mailto:jwu@nimte.ac.cn), [shengl\\_shxy@sut.edu.cn](mailto:shengl_shxy@sut.edu.cn)

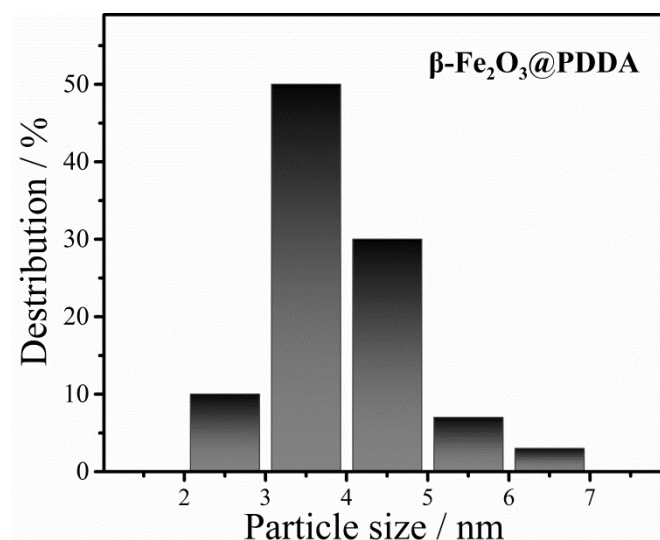

**Figure S1.** Particle size distribution of  $\beta\text{-Fe}_2\text{O}_3\text{@PDDA}$ .

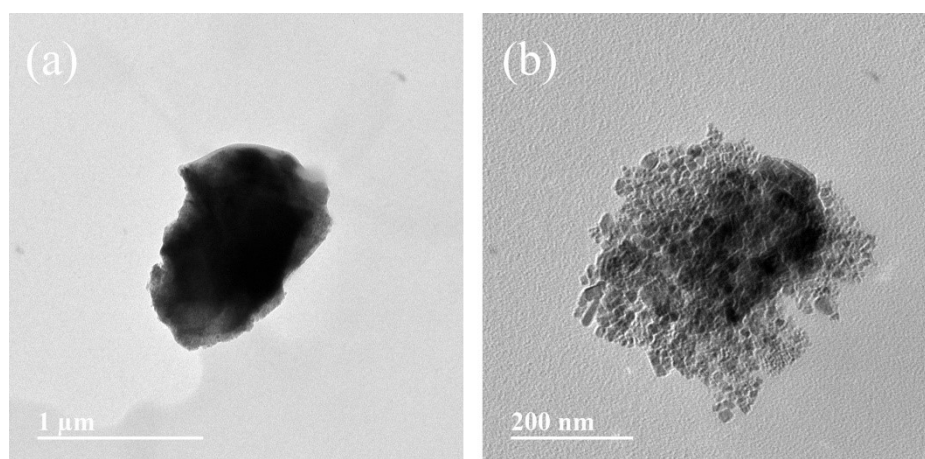

**Figure S2.** TEM image of bulk  $\alpha\text{-Fe}_2\text{O}_3$  (a); TEM image of  $\alpha\text{-Fe}_2\text{O}_3$  nanoparticle (b).

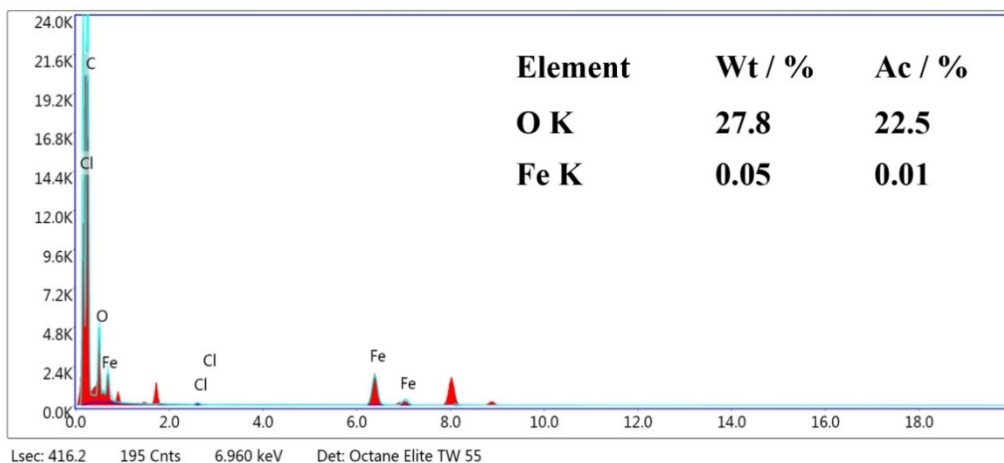

**Figure S3.** EDS spectrum of  $\beta\text{-Fe}_2\text{O}_3\text{@PDDA}$ .

**Table S1.** The crystal plane spacing of  $\beta\text{-Fe}_2\text{O}_3\text{@PDDA}$  sample and PDF standard value.

| Planes–crystal structure | d-Spacing (Å) PDF#76-1821 | crystal plane spacing of $\beta\text{-Fe}_2\text{O}_3\text{@PDDA}$ sample (nm) | Ratio(%) |
|--------------------------|---------------------------|--------------------------------------------------------------------------------|----------|
| (0 0 4)                  | 5.6375                    | 0.56                                                                           | 3        |
| (1 0 0)                  | 4.8151                    | 0.48~0.49                                                                      | 13.8     |
| (1 0 6)                  | 2.9627                    | 0.29~0.32                                                                      | 20.7     |
| (1 1 -1)                 | 2.7591                    | 0.27~0.28                                                                      | 24.1     |
| (1 1 3)                  | 2.6074                    | 0.26~0.27                                                                      | 37.9     |

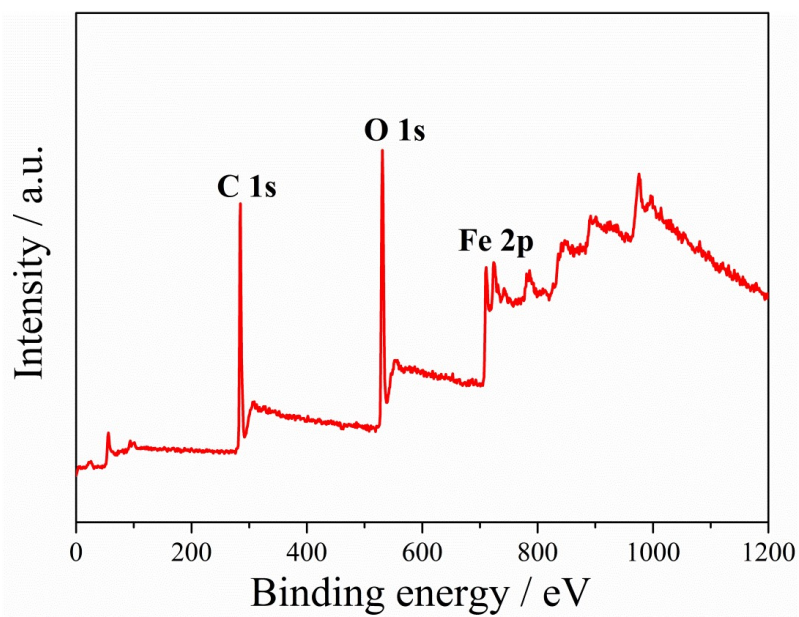

**Figure S4.** XPS spectra of  $\beta$ -Fe<sub>2</sub>O<sub>3</sub>@PDDA nanocluster.

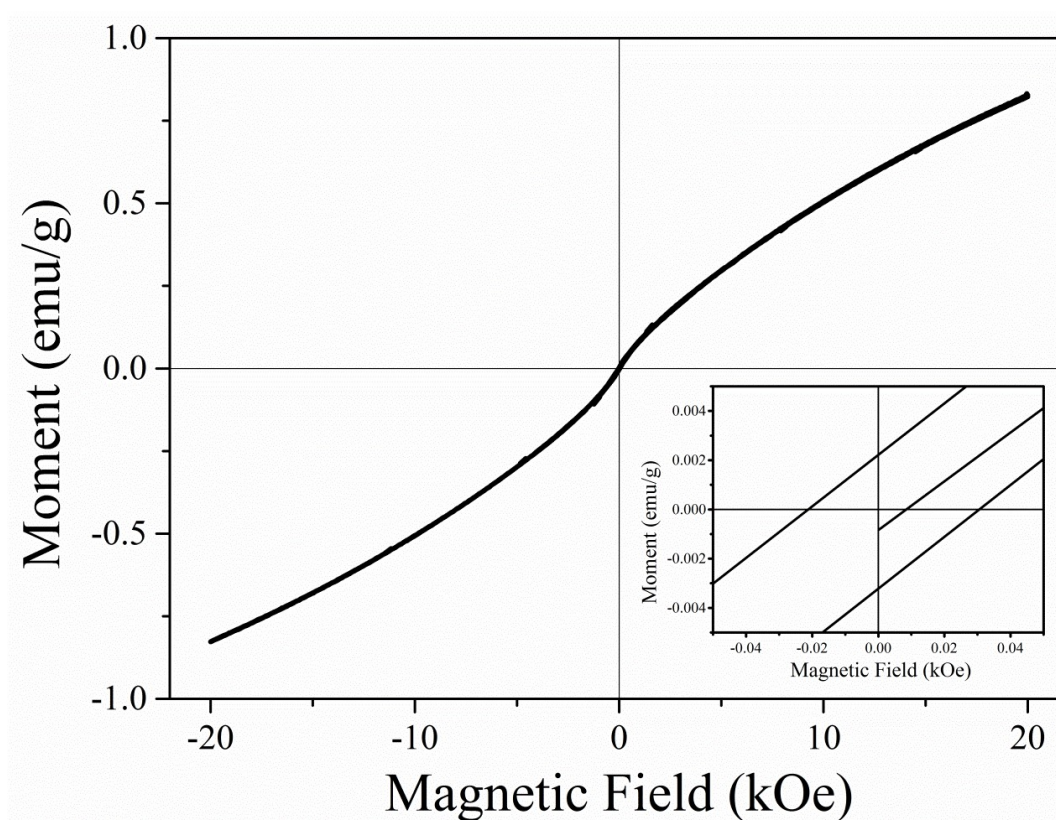

**Figure S5.** Magnetic hysteresis curve of  $\beta$ -Fe<sub>2</sub>O<sub>3</sub>@PDDA nanocluster.

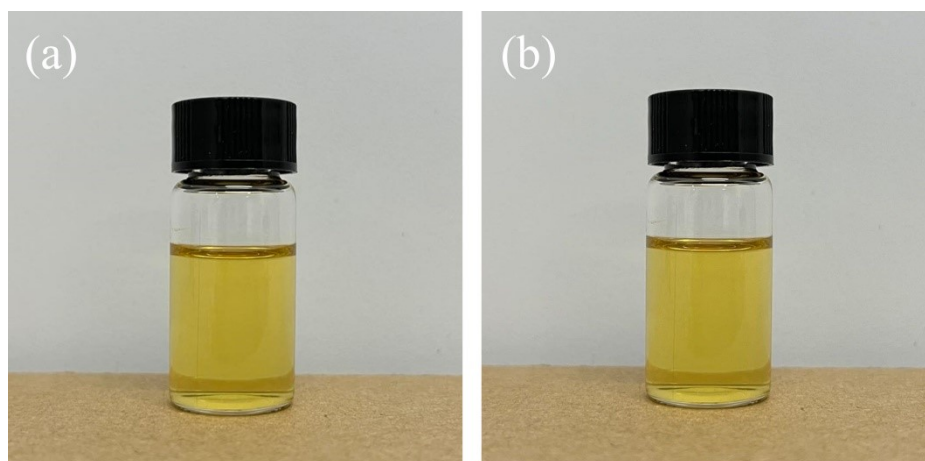

**Figure S6.**  $\beta$ - $\text{Fe}_2\text{O}_3$ @PDDA nanocluster samples are uniformly dispersed in aqueous solution(a), and let the solution sit for 10 d(b).

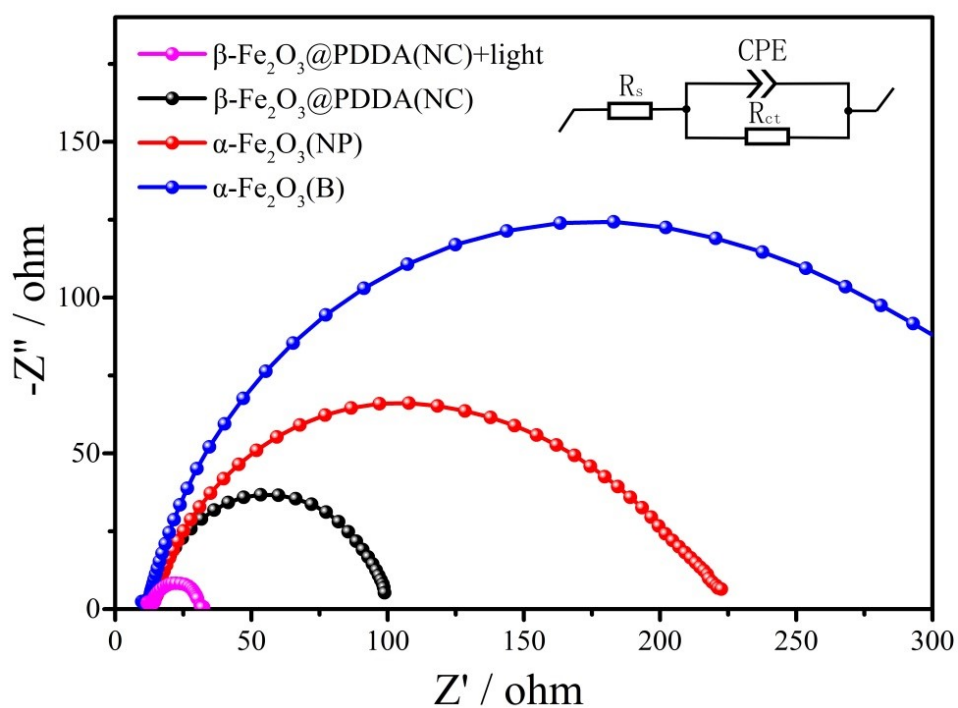

**Figure S7.** Electrocatalytic impedance spectra (EIS) Nyquist plots(inset:Equivalent circuits of Nyquist plots of materials consisting of three elements:  $R_s$ ,  $R_{ct}$ , and CPE.)

### S1. Mass activity and specific activity Calculation.

Mass activities ( $\text{mA mg}^{-1}$ ) of catalysts are calculated based on the catalyst loading ( $0.25 \text{ mg cm}^{-2}$ ) and the achieved current density  $j$  ( $\text{mA cm}^{-2}$ ) at an  $\eta$  of 520 mV. The corresponding equation is

$$\text{Mass activity (mA mg}^{-1}\text{)} = \frac{\text{Achieved current density (mA cm}^{-2}\text{)}}{\text{Catalyst loading (mg cm}^{-2}\text{)}}$$

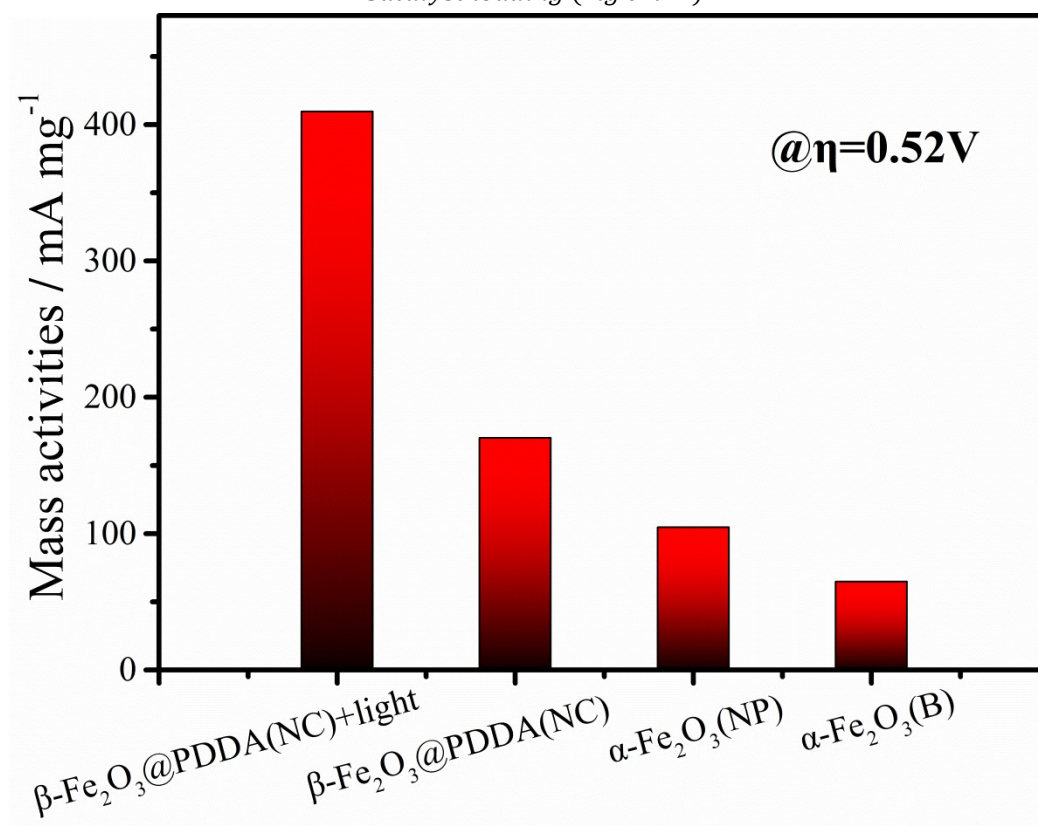

**Figure S8.** Mass activity (MA) of bulk  $\alpha\text{-Fe}_2\text{O}_3$ ,  $\alpha\text{-Fe}_2\text{O}_3$  nanoparticle,  $\beta\text{-Fe}_2\text{O}_3\text{@PDDA}$  nanocluster and  $\beta\text{-Fe}_2\text{O}_3\text{@PDDA}$  nanocluster under an additional light for OER at an  $\eta$  of 520 mV.

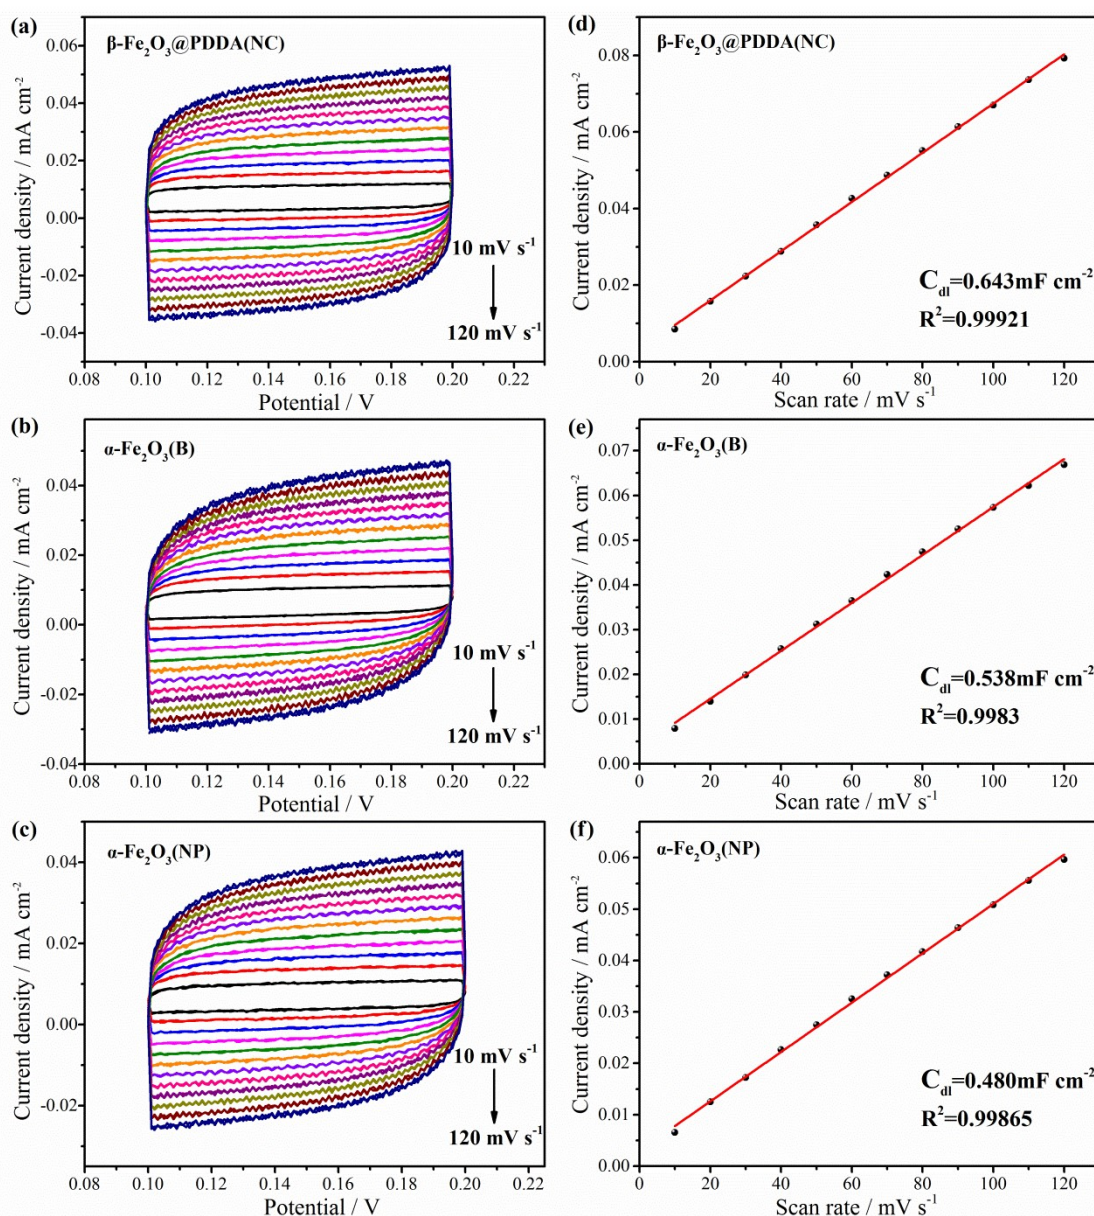

**Figure S9.** CV curves for (a)  $\beta$ -Fe<sub>2</sub>O<sub>3</sub>@PDDA nanocluster; (b) bulk  $\alpha$ -Fe<sub>2</sub>O<sub>3</sub>; (c)  $\alpha$ -Fe<sub>2</sub>O<sub>3</sub> nanoparticle in the region of 0.10~0.20 V vs. Ag/AgCl with various scan rates (10~120 mV s<sup>-1</sup>) for OER; Fitting curves for of scanning rate and current density for (d)  $\beta$ -Fe<sub>2</sub>O<sub>3</sub>@PDDA nanocluster; (e) bulk  $\alpha$ -Fe<sub>2</sub>O<sub>3</sub>; (f)  $\alpha$ -Fe<sub>2</sub>O<sub>3</sub> nanoparticle.

**Table S2.** Comparison of the OER activity for several recently reported active transition metal-based electrocatalysts.

| Electrocatalysts                                          | Overpotential<br>(mV)<br>$j=10 \text{ mA cm}^{-2}$ | Tafel slope<br>(mV dec <sup>-1</sup> ) | Electrolyte<br>(pH)     | Reference |
|-----------------------------------------------------------|----------------------------------------------------|----------------------------------------|-------------------------|-----------|
| $\beta\text{-Fe}_2\text{O}_3\text{@PDDA NC}$<br>(PEC-OER) | 300                                                | 45                                     | 1.0 M KOH               | This work |
| $\beta\text{-Fe}_2\text{O}_3\text{@PDDA NC}$              | 370                                                | 77                                     | 1.0 M KOH               | This work |
| $\alpha\text{-Fe}_2\text{O}_3$ NP                         | 430                                                | 107                                    | 1.0 M KOH               | This work |
| $\alpha\text{-Fe}_2\text{O}_3$ B                          | 460                                                | 129                                    | 1.0 M KOH               | This work |
| $\alpha\text{-Fe}_2\text{O}_3\text{@g-C}_3\text{N}_4$     | 425                                                | 280                                    | 0.5 M KOH               | 1         |
| $\gamma\text{-Fe}_2\text{O}_3$ NWs                        | 650                                                | ~                                      | 1.0 M KOH               | 2         |
| $\alpha\text{-Fe}_2\text{O}_3$                            | 310                                                | 272                                    | 0.1 M KOH               | 3         |
| $\text{Fe}_2\text{O}_3$                                   | 440                                                | 134                                    | 1.0 M KOH               | 4         |
| Ni- $\text{Fe}_2\text{O}_3$                               | 277                                                | 68                                     | 1.0 M KOH               | 4         |
| $\gamma\text{-FeOOH}$                                     | 550                                                | ~                                      | 1.0 M KOH               | 5         |
| $\text{FeTiO}_3$ hollow spheres                           | 420                                                | ~                                      | 1.0 M KOH               | 6         |
| NiO                                                       | ~                                                  | 242                                    | 1.0 M KOH               | 7         |
| NiOOH                                                     | 360                                                | 111                                    | 1.0 M KOH               | 8         |
| $\text{Co}_3\text{O}_4$ Mesoporous                        | 636                                                | ~                                      | 0.1 M KOH               | 9         |
| $\text{Co}_3\text{O}_4$ Mesoporous                        | 476                                                | ~                                      | 1.0 M KOH               | 9         |
| $\text{Co}_2\text{CrO}_4$                                 | 400                                                | 87                                     | 1.0 M KOH               | 10        |
| $\text{Co}_2\text{CrO}_4$                                 | 370                                                | 56                                     | 1.0 M KOH               | 10        |
| $\text{IrO}_2$                                            | 481                                                | 238                                    | 1.0 M HClO <sub>4</sub> | 11        |
| Pt                                                        | 420                                                | ~                                      | 1.0 M KOH               | 12        |

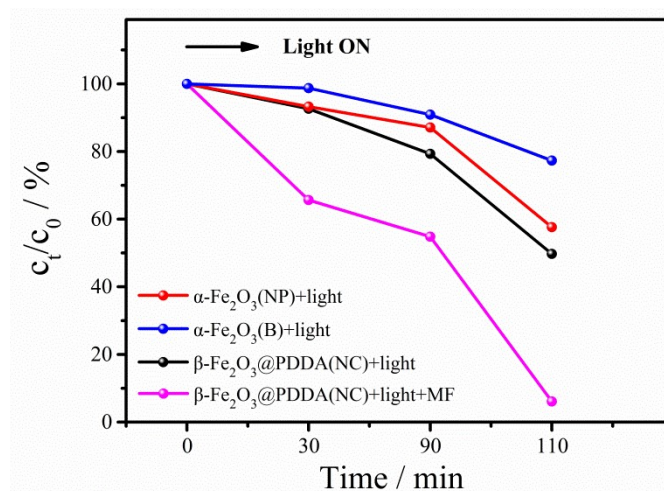

**Figure S10.** Line chart of RhB concentration ( $C/C_0$ ) changing with irradiation time.



**Table S3.** Comparison of several iron oxide based photocatalysis for RhB degradation reported in recent years.

| Photocatalysts                                                             | Degradation time (min) | Degradation percentage of the RhB dye (%) | Reference.    |
|----------------------------------------------------------------------------|------------------------|-------------------------------------------|---------------|
| $\beta$ -Fe <sub>2</sub> O <sub>3</sub> @PDDA NC (magnetic-field-enhanced) | 110                    | 94                                        | This work     |
| $\beta$ -Fe <sub>2</sub> O <sub>3</sub> @PDDA NC                           | 110                    | 50                                        | This work     |
| $\alpha$ -Fe <sub>2</sub> O <sub>3</sub> NP                                | 110                    | 42                                        | This work     |
| $\alpha$ -Fe <sub>2</sub> O <sub>3</sub> B                                 | 110                    | 23                                        | This work     |
| pure $\alpha$ -Fe <sub>2</sub> O <sub>3</sub>                              | 120                    | 56                                        | <sup>13</sup> |
| PANI/ $\alpha$ -Fe <sub>2</sub> O <sub>3</sub> /FeOOH                      | 120                    | 91                                        | <sup>13</sup> |
| $\alpha$ -Fe <sub>2</sub> O <sub>3</sub>                                   | 100                    | 60                                        | <sup>14</sup> |
| $\alpha$ -Fe <sub>2</sub> O <sub>3</sub> /RT(0 mM)                         | 100                    | 76                                        | <sup>14</sup> |
| $\alpha$ -Fe <sub>2</sub> O <sub>3</sub> /RT(0.025 mM)                     | 100                    | 93                                        | <sup>14</sup> |

## References

1. O. Alduhaish, M. Ubaidullah, A. M. Al-Enizi, N. Alhokbany, S. M. Alshehri and J. Ahmed, *Sci Rep*, 2019, **9**, 14139.
2. S. Arumugam, Y. Toku and Y. Ju, *Sci Rep*, 2020, **10**, 5407.
3. U. Farooq, P. Chaudhary, P. P. Ingole, A. Kalam and T. Ahmad, *ACS Omega*, 2020, **5**, 20491-20505.
4. A. Samanta, S. Das and S. Jana, *ACS Sustain. Chem. Eng.*, 2019, **7**, 12117-12124.
5. D. Friebe, M. W. Louie, M. Bajdich, K. E. Sanwald, Y. Cai, A. M. Wise, M. J. Cheng, D. Sokaras, T. C. Weng, R. Alonso-Mori, R. C. Davis, J. R. Bargar, J. K. Norskov, A. Nilsson and A. T. Bell, *J Am Chem Soc*, 2015, **137**, 1305-1313.

6. T. Han, Y. Chen, G. Tian, J. Q. Wang, Z. Ren, W. Zhou and H. Fu, *Nanoscale*, 2015, **7**, 15924-15934.
7. Y. Zhao, X. Jia, G. Chen, L. Shang, G. I. Waterhouse, L. Z. Wu, C. H. Tung, D. O'Hare and T. Zhang, *J Am Chem Soc*, 2016, **138**, 6517-6524.
8. H.-Y. Wang, Y.-Y. Hsu, R. Chen, T.-S. Chan, H. M. Chen and B. Liu, *Adv. Energy Mater.*, 2015, **5**, 1500091.
9. H. Tüysüz, Y. J. Hwang, S. B. Khan, A. M. Asiri and P. Yang, *Nano Res.*, 2012, **6**, 47-54.
10. C.-C. Lin and C. C. L. McCrory, *ACS Catal.*, 2016, **7**, 443-451.
11. L. Ouattara, S. Fierro, O. Frey, M. Koudelka and C. Comninellis, *J Appl Electrochem*, 2009, **39**, 1361-1367.
12. C. K. Ranaweera, C. Zhang, S. Bhoyate, P. K. Kahol, M. Ghimire, S. R. Mishra, F. Perez, B. K. Gupta and R. K. Gupta, *Mater. Chem. Front.*, 2017, **1**, 1580-1584.
13. R. Qin, L. Hao and J. Li, *J. Inorg. Organomet. Polym. Mater*, 2020, **30**, 4452-4458.
14. Z. Zhou, H. Yin, Y. Zhao, J. Zhang, Y. Li, J. Yuan, J. Tang and F. Wang, *Catalysts*, 2021, **11**, 396.
